# Supplementary material for: The International Soil Moisture Network: serving Earth systemscience for over a decade
Source: Copernicus journal article supplement (doi:10.5194/hess-2021-2), 2021-01-28
Supplement: Supplementary file [file hess-2021-2-AC3-supplement.pdf]

## 1 Reply to Mirko Mälicke, 03 May 2021

The authors present the International Soil Moisture Network (ISMN), a global database and collection of in situ soil moisture measurements. Beyond data storage, general issues about representativeness, data harmonization, and data quality are raised and answered. Finally, the extensive description of the ISMN state is accompanied by a review of scientific studies that used ISMN.

I think the manuscript is overall of high quality, great importance, clear language and I have fewer minor comments than the manuscript has authors.

With Best regards,  
Mirko Mälicke

Dear Mirko Mälicke, thank you very much for your positive assessment of the manuscript and the valuable suggestions to further improve it. Our suggestions to improve the manuscript are given in blue font.

### My main comments are:

- Section 4.2.1 This is the first section reviewing the usage of ISMN in scientific publications. The authors present a huge amount of studies, that use ISMN data to evaluate satellite products. The whole section is a collection of references and very brief descriptions, which satellite products were involved. I am wondering if there is any general conclusion that can be drawn from this section. Are there studies that found flaws in satellite products, which would not have been found without ISMN data? Did ISMN data and especially the fact that data from various networks is available, foster or even enable the development of novel satellite-based products, that would not have been possible?

How often is more than one network involved? Or to put it the other way around: Is the multitude of available networks driving satellite product evaluation or is ISMN a collection of isolated data that is used for evaluation anyway? There are so many great studies mentioned in this section, that it would be a waste to just list them without gaining some new insights.

These are all very good points, although it is be impossible to provide a conclusive answer to all of these questions. However, we suggest to add a subsection 4.7 at the end of chapter 4 where we discuss more explicitly the added value of the ISMN over the use of individual networks or over in situ soil moisture data obtained from elsewhere.

Approximately one third (34%) of the studies making use of ISMN used multiple networks, the choice of which depended on the scope of the study, the geographical region and period of interest, and the year the study was performed (with more and more data having become available over time). Examples of such studies using multiple networks are:

- Brocca et al. (2011) (6 ISMN networks used: IRPI, Campania, Calabria, UMSUOL, REMEDHUS, SMOSMANIA)
- Albergel et al. (2012) (3 ISMN networks used: REMEDHUS, UDC-SMOS, UMSUOL)
- Albergel et al. (2013) (5 ISMN networks used: SCAN, SMOSMANIA, REMEDHUS, MAQU, OzNet)
- Pellarin et al. (2013) (2 ISMN networks used: AMMA, USCRN)
- de Jeu et al. (2014) (10 ISMN networks used: AMMA, ARM, HYDROL-NET\_PERUGIA, MAQU, MOL-RAO, OZNET, REMEDHUS, SCAN, SMOSMANIA, SNOTEL)
- Parinussa et al. (2014) (4 ISMN networks used: AMMA, REMEDHUS, SMOSMANIA, IIT Kanpur)
- Brocca et al. (2014) (4 ISMN networks used: SASMAS, SMOSMANIA, REMEDHUS, ICN)
- Paulik et al. (2014) (23 ISMN networks used: AMMA, ARM, CALABRIA, CAMPANIA, COSMOS, FLUXNET-AMERIFLUX, FMI, HYDROL-NET PERUGIA, ICN, IIT KANPUR, MAQU, MOL-RAO, OZNET, REMEDHUS, SASMAS, SCAN, SMOSMANIA, SNOTEL, SWEX POLAND, UDC SMOS, UMBRIA, UMSUOL, USDA-ARS)

- 45      – Balsamo et al. (2015) (6 ISMN networks used: AMMA, OzNet, SMOSMANIA, REMEDHUS, SCAN, SNOTEL)
- Brocca et al. (2015) (REMEDHUS used from ISMN but also other networks from different providers)
- Kim et al. (2015a) (2 ISMN networks used: COSMOS, USCRN)
- Kim et al. (2015b) (8 ISMN networks: COSMOS, FMI, PBO\_H2O, REMEDHUS, SCAN, SOILSCAPE, TERENO, USCRN)
- 50      – Dirmeyer et al. (2016) (9 ISMN networks used: ARM, AWDN, COSMOS, PBO\_H2O, SCAN, SNOTEL, SOILSCAPE, USCRN, USDA ARS)
- Wang et al. (2016) (6 ISMN networks used: HOBE, MAQU, REMEDHUS, SASMAS, SMOSMANIA, TP (China))
- Scholze et al. (2016) (7 ISMN networks in US used)
- Al-Yaari et al. (2016) (4 ISMN networks used: AMMA, OZNET, REMEDHUS, SCAN)
- 55      – Enenkel et al. (2016) (4 ISMN networks used: COSMOS, DAHRA, REMEDHUS, SMOSMANIA)
- Kerr et al. (2016) (8 ISMN networks used: AMMA, ARM, DAHRA, OZNET, PBO-H2O, SCAN, SNOTEL, USCRN)
- Wu et al. (2016) (4 ISMN networks used: SCAN, COSMOS, USCRN, SNOTEL)
- Parinussa et al. (2016) (all available ISMN networks at that time used?)
- 60      – van der Schalie et al. (2016) (14 ISMN networks used: AMMA, ARM, COSMOS, FLUXNET-AMERIFLUX, OZNET, PBO H2O, REMEDHUS, SCAN, SMOSMANIA, SNOTEL, SOILSCAPE, SWEX POLAND, USCRN, VAS)
- Zhao et al. (2016) (6 ISMN networks used: CTP\_SMTMN, ICN, OZNET, SCAN, SMOSMANIA, SNOTEL)
- Pan et al. (2017) (3 ISMN networks used: SCAN, SNOTEL, USCRN)
- 65      – Cui et al. (2017) (REMEDHUS from ISMN used and also one other network from another provider)
- Gruber et al. (2018) (2 ISMN networks used: SCAN, USCRN)
- Alemohammad et al. (2018) (10 ISMN networks used: FMI, iRON, REMEDHUS, RSMN, SCAN, SMOSMANIA, SNOTEL, SOILSCAPE, TERENO, USCRN)
- Eroglu et al. (2019) (2 ISMN networks used: OzNet, SCAN)
- 70      – Bauer-Marschallinger et al. (2019) (2 ISMN networks used: COSMOS, UMBRIA)
- Senyurek et al. (2020) (3 ISMN networks used: COSMOS, SCAN, USCRN)
- Link et al. (2020) (2 ISMN networks used: REMEDHUS, SCAN)
- Beck et al. (2020) (27 ISMN networks used: ARM, BIEBRZA, BNZ-LTER, COSMOS, CTP\_SMTMN, DAHRA, FMI, FR\_Aqui, HOBE, HYDROL-NET, iRON, LAB-net, MySMNet, ORACLE, OZNET, REMEDHUS, RISMA, RSMN, SCAN, SMOSMANIA, SNOTEL, SOILSCAPE, SWEX, TERENO, UDC, USCRN, WSMN)
- 75      – Liu et al. (2020) (3 ISMN networks used: REMEDHUS, NAQU, OZNNET)
- Kovačević et al. (2020) (3 ISMN networks used: PBO\_H2O, SCAN, USCRN)
- Hagan et al. (2020) (20 ISMN networks used: AMMA-CATCH, ARM, CARBOAFRICA, COSMOS, CTP-SMTMN, DAHRA, FR-Aqui, HOBE, LAB-net, MAQU, OZNET, REMEDHUS, RSMN, SASMAS, SCAN, SMOSMANIA, SNOTEL, UMBRIA, UMSUOL, USCRN)
- 80

Although it is impossible to quantify precisely to what degree the ISMN has contributed to product improvements, there are certainly studies that discovered flaws in satellite products that would not have been detected without the use of the ISMN. The main reason is that the ISMN provides data from a large number of networks, thus giving insights in product skill in a large variety of climate zones, land cover types and so on, which no single network could have provided.

85 Secondly, the data harmonisation and unified quality control minimise the chance that differences in skill potentially  
observed between locations with different environmental characteristics is an artefact of a different treatment of the data.  
Examples of studies that not only identified flaws but really improved models/products etc. using data from the ISMN  
include:

- Beck et al. (2020), who calibrated 7 relevant parameters of the HBV model using in situ soil moisture measurements  
90 from 177 independent sensors from the ISMN;
- Pan et al. (2017), who used ISMN soil moisture data to train and validate a new Artificial Neural Network based  
soil moisture product;
- Gruber et al. (2018), who assimilated spatially sparse ISMN soil moisture into a Continuous Model Domain: Gruber  
et al. (2018) over the Continental US to obtain improved model performance;
- 95 – Eroglu et al. (2019), who trained a neural network with ISMN data to derive high spatio-temporal resolution  
CYGNSS soil moisture estimates;
- Xu et al. (2018), who fused ISMN and GNSS-R data to obtain a superior soil moisture product over western  
Continental U.S.;
- 100 – Kang et al. (2019), who calibrated the SMOS V620 soil moisture retrieval algorithm for local site conditions in the  
humid tropical regions of Malaysia, an area where the original product shows poor skill.

Even if it is likely that most products could have been developed without the use of the ISMN, in many cases the ISMN  
has made the development and evaluation more robust, both because of the large number of readily accessible data and  
because of the large networks and datasets that can be accessed only through the ISMN.

- Section 5.1.2 (P. 25): The authors describe challenges concerning the spatial representativeness of ISMN data and the  
105 resulting issues for validating (spatially) coarser soil moisture data. From my point of view, similar issues can result from  
temporal inconsistencies. While the ISMN has made a lot of effort to harmonize the temporal resolution of ISMN data,  
this does not yet solve all representativeness issues. The authors should consider adding a short paragraph on temporal  
representativeness issues here, as well.

110 We agree that temporal representativeness issues may exist but that due to the standard sampling of 1 hour they have a  
smaller impact than spatial ones. We believe that a dedicated subsection on this issue would be too much, so instead we  
propose to add an additional paragraph at the end of the section:

"Also temporal representativeness issues may exist, but due to the hourly sampling of most datasets the ISMN usually  
have a denser sampling than most remote sensing or model data sets. Thus, for most applications the ISMN can be  
115 downsampled to the process or observation timescale of interest. However, some of the older, manually sampled datasets  
have sampling intervals of about two weeks, and thus may miss many higher frequency wet or dry spells. On a similar  
note, datasets with a daily sampling or averaging (e.g., Cosmic ray or GPS reflectometry observations) may miss rainfall  
peaks and are unsuitable to study sub-daily variability."

- As a general comment, I would like to point out, that the first almost 20 pages of the manuscript are summarizing and  
120 discussing the data in ISMN as well as ISMN itself. While I do think that all of the presented figures and sections  
are important and helpful, the more classic review of scientific studies using ISMN is noticeably shorter. I think in some  
parts, like section 4.2.1, the authors might consider extending section 4. Some more insights on how the reviewed studies  
are fostered or are even made possible in the first place, due to ISMN could be helpful. ISMN is not just a collection of  
data files, it's a reference database, that has the power to set standards and produce unified quality controls and metadata  
125 information for soil moisture measurements. I would love to see a section elaborating how ISMN might already do this  
today, or what a possible path might look like for the future. Reviewing all the work that is based on or involving ISMN,  
the authors might see a pattern here.

This comment is related to the one above. We suggest to add an extra subsection to Chapter 4 on the added value of the ISMN over individual networks (See above). regarding setting standards, we propose the add the following sentence to section 4.2.2.: "The combination of ISMN, QA4SM, and enhanced quality control protocols and selection procedures to establish a set of fiducial reference measurements, is expected to become the standard for satellite soil moisture validation in the next years (Bayat et al., 2021).

**These are my minor comments in order of appearance:**

- P.2 L.10: Which proportion of the total datasets are still updated? A number could help the reader to set "many" into a context. The number is named on P. 4 L. 75 and the authors could consider moving this up. From my point of view, having roughly 70% of the networks still active is a feature and more than I would have expected.

We agree and mention this number also in the abstract.

- P.3 L. 36: At this point I was already so excited about the *advanced quality control methods*, that the authors could consider naming at least one of them as an example, already.

We appreciate your excitement about the advanced quality control methods but for the sake of the text flow and redundancy we believe it is better not to further elaborate on it at this point. Instead, we refer to the original paper describing these methods and to the section in the current paper describing the updates.

- P.4 L. 50 - 51: I personally like the idea of involving citizen scientists in the collection of soil moisture data and have already involved students (who are not 'citizens' in this case) in some short measurement campaigns. I personally doubt, that citizen scientists can really contribute data that hold metadata and quality control requirements of most scientific applications. Therefore, from a personal point of view, I would like to see at least one reference of a successful application here.

We agree that this is very challenging and certainly has caveats. We elaborate on this in Section ???. We will add this reference.

- P. 4 L. 69: The authors might consider adding some numbers about the per-continent distribution of networks here, to give the reader a quick overview.

We added these numbers to main document.

- P. 4 L. 72: I am wondering if it would be feasible to add a graph about the landscape type distribution, here.

We were unsure what is meant with *landscape type*, but propose to include a plot showing the distribution per Köppen-Geiger climate class (Figure 1).

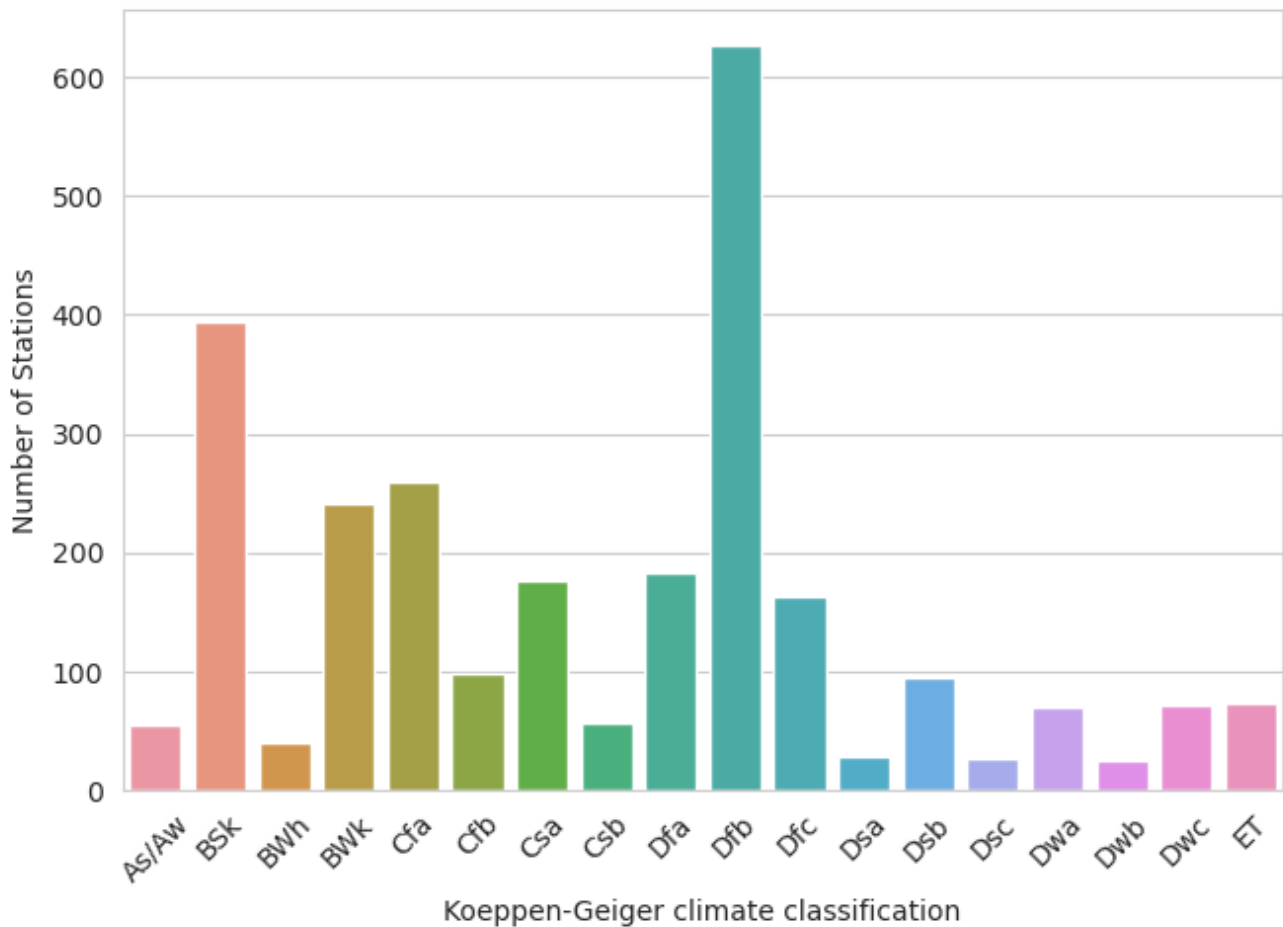

**Figure 1.** Distribution of ISMN-sites per Koeppen-Geiger climate classification, only categories with >20 sites are considered (Status June 2021).

- Figure 1 (P. 5) Due to the station density, I suggest putting a sub-figure of the USA into the map. Right now, I can only see that there are a lot of different stations of different colors. Another approach could be to rather indicate the geometric centroids of the networks in the USA and keep the stations in a transparent grey

This is a good point. We propose to plot the networks as in Figure 2. We believe that this is a better solution than plotting the centroids, as the location of the centroids is sometimes not representative for the actual location of the stations, particularly in large countries or for networks spanning multiple continents.

2).



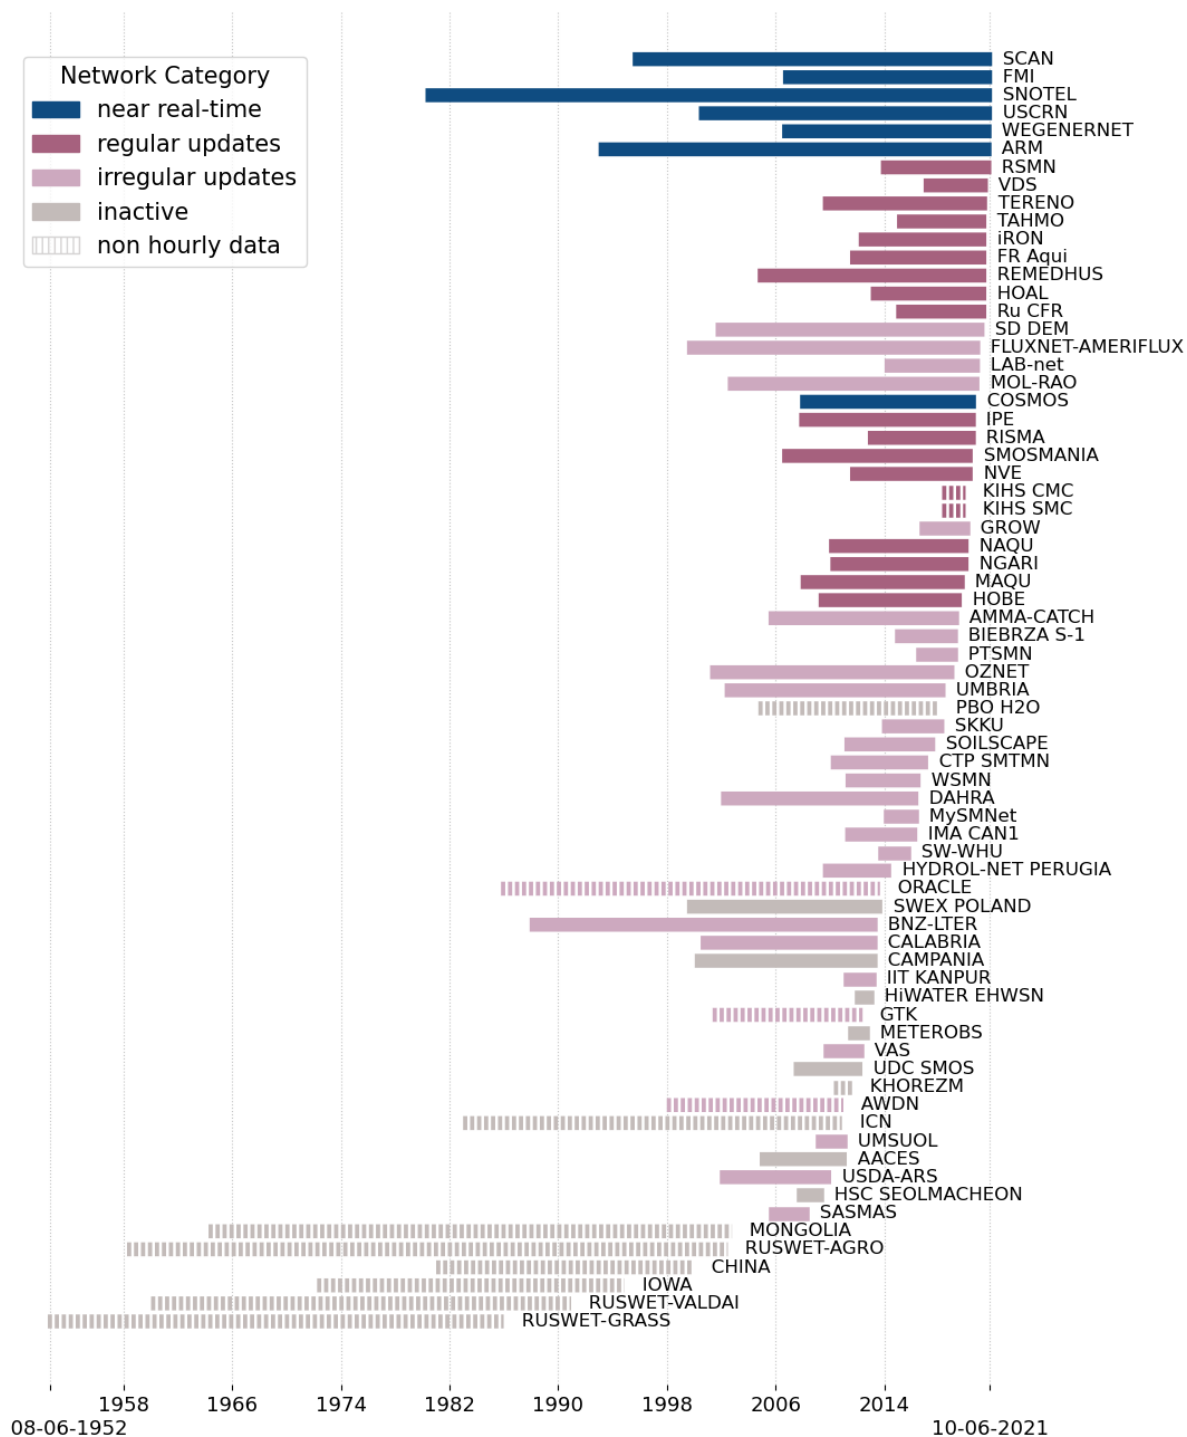

**Figure 3.** Overview of all available networks, the individual time span of the data availability within the ISMN, their operational status and their update category (Status June 2021).

170

- Table 1 (P. 7) I think this table could really be enhanced by adding another column containing the total count of sensors / timeseries / stations, whatever technically appropriate, of the respective variable. I.e. for soil suction, it will be of importance for many readers, how often soil moisture data is accompanied by suction data.

This is a good point. We propose to expand the table as in 1

Table 1: Overview of all available temporally dynamic variables stored in the ISMN database. \*Note that for precipitation and air temperature the measurement height above the ground surface is indicated.

| variable name         | abbreviation | units                     | measurement depth* [m] | variable with depth? | number of time series (stations) |
|-----------------------|--------------|---------------------------|------------------------|----------------------|----------------------------------|
| soil moisture         | sm           | $\text{m}^3\text{m}^{-3}$ | 0.00 - 2.10            | Y                    | 10610 (2822)                     |
| soil suction          | su           | kPa                       | 0.04 - 0.75            | Y                    | 73 (18)                          |
| soil temperature      | ts           | °C                        | 0.00 - 2.03            | Y                    | 8113 (1629)                      |
| air temperature       | ta           | °C                        | 2.00 - 12.00           | Y                    | 1292 (1234)                      |
| surface temperature   | tsf          | °C                        | 0.00 - 0.00            | N                    | 126 (126)                        |
| precipitation         | p            | mm                        | 0.00 - 2.00            | N                    | 759 (700)                        |
| snow depth            | sd           | mm                        | 0.00                   | N                    | 562 (555)                        |
| snow water equivalent | sweq         | mm                        | 0.00                   | N                    | 507 (427)                        |

175

- P.9 L. 151: The authors state, that the data is formatted according to CEOP or a slightly modified version. Does this imply that the data can come in different formats, or is it always the modified format (which was derived from CEOP)?

Indeed, the formatting can be chosen by the user. We will rephrase the sentence to make this clearer.

P. 10 L. 159 - 160: I was just wondering if the authors think, that this user feedback (on quality issues) might also be a valuable public resource (similar to Github issues)? Having a 'conversation' about quality issues publicly, might help other users to handle these issues for their specific application.

180

This is a good idea. Several years ago, we already started communicating dataset issues via the forum, but this has never really broadly adopted by the users. Github is currently used for the ISMN reader and quality control package (FlagIt) but is more on the developer side than for reporting general issues (e.g., how to download, how to access data, how to participate, etc.) or discuss data quality (e.g., more detailed timeseries issues, specific station information, etc.). Also, we operate a Twitter channel which is likely to reach out more easily to users. We are currently thinking of ways how we can coordinate the various outreach channels to disseminate information more efficiently and with maximum outreach.

185

- P. 10 L. 161 - 162: How exactly can a registered download option prevent data misuse? Isn't it the distributed license that regulates the terms and conditions of how the data may be used? Comparable to this manuscript itself, which can also be retrieved without registration and it's the CC BY 4.0 that prevents me from misusing it.

Theoretically, a license agreement should cover this but in practice this can hardly be avoided as it is difficult to prove how the data have been used. However, the registration mainly serves as a filter to gaining access to the exact station coordinates, as there have been reported cases of stolen equipment from observation sites.

190

- P. 11 L. 193 - 195: I was a bit confused by this paragraph. Does it mean that an additional flag for the other variables soil temperature, air temperature, and precipitation was added, or that a spurious observation in one of these variables will also flag the soil moisture measurement as spurious?

We agree that this formulation is confusing. We therefore rephrased it to: "In case more than one soil temperature, air temperature, or precipitation sensor is available at a site, a flag is raised for the soil moisture measurement if the conditions of flags D01, D02, and D04, respectively is met at least for one of these sensors."

195

- P. 15 L. 239: What is ubRSMD?

unbiased Root-Mean-Squared Difference (ubRMSD). We spelled out this acronym in the main text.



200 – P. 16 L. 248: A short clause describing what the "triple collocation approach" is would help me to understand this section even better.

We propose to rephrase this section to clarify it: " Gruber et al. (2013) adopted a triple collocation approach (TCA) to characterise the representativeness errors of ISMN data for coarse-scale (~25 km) use. TCA is a statistical analysis using a combination of three datasets with independent random errors to estimate the error variance in each of these datasets. Here, we apply the TCA to estimate the representativeness errors of the ISMN data of all networks with sufficient sampling in the period 2001-2019 for application at the coarse scale. ESA CCI SM passive soil moisture (v5.2, Gruber et al. (2019b), Dorigo et al. (2017)) and top-layer ERA5 volumetric soil water content (Hersbach et al., 2020) are used to complement the triplets.

– P 20 L. 325: I guess the question mark should not be there.  
resolved

210 – Section 4.2.2 (P.20 - 21) This section gives an overview of operational services relying on ISMN data. Unfortunately, the authors only refer to the 'ISMN data'. I think it could be more helpful for readers, that might happen to be users of the services as well if the specific networks involved for each of these services are listed. Otherwise, I am under the impression, that all data is involved all the time.

215 Unfortunately, it is impossible for us to trace back which networks were exactly used. The same applies to many other peer-reviewed validation studies. This has been one of our main motivations to initiate QA4SM which aims for full transparency of the entire validation chain, including network and station selection. An example is given in <https://doi.org/10.5281/zenodo.4736927> and in <https://doi.org/10.5281/zenodo.4120205> for C3S and ESA CCI Soil Moisture validation, respectively. We propose to add these examples to the main document.

220 – Section 5.1.3 For me it was not clear from this section, if ISMN nowadays already includes a considerable amount of low-cost sensor networks and if the raised issues could be addressed using ISMN. The authors should consider clarifying this.

We propose to add the following sentence: "The ISMN has integrated low-cost sensor measurements from the GROW observatory (see next section), but a number of practical challenges arise when integrating such data.

225 – Section 5.1.4 This is connected to the point above: Is GROW part of ISMN? I guess it is, as it is listed in the appendix. Further, this section points at some challenges connected to citizen science, but it remains kind of open whether citizen science data should be contributed or not. The authors should make this more clear. A scientific user of ISMN should be aware of the context of data collection and I am not sure if the metadata provided is suitable enough to transport this important information if it is even contained.

230 We propose to add the following sentence to clarify this: "An outstanding example of a citizen science project focusing on soil moisture is the GROW Observatory ([growobservatory.org](http://growobservatory.org)), from which datasets spanning at least a year of data have been added to the ISMN."

235 As crowd-sourced data can have completely different characteristics and properties, it is not possible to give a simple answer whether such measurements should be included or not. We addressed the most important points which should be considered before inclusion, such as: thorough evaluation of the (low-cost) sensors used (lines 522-525), training citizens on installation and maintenance of the sensors (lines 538-540), visual inspection of the timeseries (when possible - lines 552-553), presence of few/several sensors within satellite footprint in order to reduce uncertainties (lines 550-552). If all the above mentioned issues have been carefully addressed (i.e. reflecting a well-organized citizen science project - lines 554-555), then crowd-sourced data can be included into the ISMN. As crowd-sourced data can have completely different characteristics and properties, it is not possible to give a simple answer whether such measurements should be included or not. We addressed the most important points which should be considered before inclusion, such as: thorough evaluation of the (low-cost) sensors used (lines 522-525), training citizens on installation and maintenance of the sensors (lines 538-540), visual inspection of the timeseries (when possible - lines 552-553), presence of few/several sensors

within satellite footprint in order to reduce uncertainties (lines 550-552). If all the above mentioned issues have been carefully addressed (i.e. reflecting a well-organized citizen science project - lines 554-555), then crowd-sourced data can be included into the ISMN.

**Finally, I would like to make two personal comments, that are not part of the review in a strict sense:**

- Concerning 5.2.3: Working on a web-based data portal for a couple of years myself, I would suggest adding a new section to the data overview Bubbles on the map, that contains a suggestion on how to cite a specific dataset. The same could be implemented for networks and on download. I think this will already significantly increase the visibility and citations, as they are usually not missed out on bad will.

Yes this is indeed a great idea. Why did we not think of that? We would need to adjust the display query as well as the bubble itself but it should be manageable. To your information we have just recently added a separate database table for citations. With this table we want to integrate a file per download containing a list of citation information for each individual network.

- Secondly, I personally don't want to finish my comment, without mentioning ESSD. The authors have described the state of the ISMN database in great detail and will convince every reader why the database and the data itself are unique and a real asset for environmental science. While this manuscript is labeled as a review paper, a considerable amount of it is also halfway a dataset description paper. From my personal point of view, it could be really worth it to prepare an ESSD publication for ISMN itself. That can help to further increase the visibility of ISMN. At the end of the day, I found myself a couple of times hitting 'soil moisture' into the search bar of ESSD, and not finding ISMN is a pity.

We have indeed thought of submitting a manuscript to ESSD, but unfortunately the ISMN does not qualify for this journal. Since the ISMN requires a (free) registration, as requested by our data providers to prevent access to sensitive information (as mentioned before), this is not considered completely open access.

With Best regards,  
Mirko Mälicke

## References

- Al-Yaari, A., Wigneron, J., Kerr, Y., de Jeu, R., Rodriguez-Fernandez, N., van der Schalie, R., Al Bitar, A., Mialon, A., Richaume, P., Dolman, A., and Ducharne, A.: Testing regression equations to derive long-term global soil moisture datasets from passive microwave observations, *Remote Sensing of Environment*, 180, 453–464, <https://doi.org/10.1016/j.rse.2015.11.022>, special Issue: ESA's Soil Moisture and Ocean Salinity Mission - Achievements and Applications, 2016.
- Albergel, C., de Rosnay, P., Gruhier, C., Muñoz-Sabater, J., Hasenauer, S., Isaksen, L., Kerr, Y., and Wagner, W.: Evaluation of remotely sensed and modelled soil moisture products using global ground-based in situ observations, *Remote Sensing of Environment*, 118, 215–226, <https://doi.org/10.1016/j.rse.2011.11.017>, 2012.
- Albergel, C., Dorigo, W., Reichle, R. H., Balsamo, G., de Rosnay, P., Muñoz-Sabater, J., Isaksen, L., de Jeu, R., and Wagner, W.: Skill and Global Trend Analysis of Soil Moisture from Reanalyses and Microwave Remote Sensing, *Journal of Hydrometeorology*, 14, 1259–1277, <https://doi.org/10.1175/JHM-D-12-0161.1>, 2013.
- Alemohammad, S. H., Kolassa, J., Prigent, C., Aires, F., and Gentile, P.: Global downscaling of remotely sensed soil moisture using neural networks, *Hydrology and Earth System Sciences*, 22, 5341–5356, <https://doi.org/10.5194/hess-22-5341-2018>, 2018.
- Balsamo, G., Albergel, C., Beljaars, A., Boussetta, S., Brun, E., Cloke, H., Dee, D., Dutra, E., Muñoz Sabater, J., Pappenberger, F., de Rosnay, P., Stockdale, T., and Vitart, F.: ERA-Interim/Land: a global land surface reanalysis data set, *Hydrology and Earth System Sciences*, 19, 389–407, <https://doi.org/10.5194/hess-19-389-2015>, 2015.
- Bauer-Marschallinger, B., Freeman, V., Cao, S., Paulik, C., Schaufler, S., Stachl, T., Modanesi, S., Massari, C., Ciabatta, L., Brocca, L., and Wagner, W.: Toward Global Soil Moisture Monitoring With Sentinel-1: Harnessing Assets and Overcoming Obstacles, *IEEE Transactions on Geoscience and Remote Sensing*, 57, 520–539, <https://doi.org/10.1109/TGRS.2018.2858004>, 2019.
- Beck, H. E., Pan, M., Miralles, D. G., Reichle, R. H., Dorigo, W. A., Hahn, S., Sheffield, J., Karthikeyan, L., Balsamo, G., Parinussa, R. M., van Dijk, A. I. J. M., Du, J., Kimball, J. S., Vergopolan, N., and Wood, E. F.: Evaluation of 18 satellite- and model-based soil moisture products using in situ measurements from 826 sensors, *Hydrology and Earth System Sciences Discussions*, 2020, 1–35, <https://doi.org/10.5194/hess-2020-184>, 2020.
- Brocca, L., Hasenauer, S., Lacava, T., Melone, F., Moramarco, T., Wagner, W., A, D., Matgen, P., Martínez-Fernández, J., Llorens, P., Latron, J., Martin, C., and Bittelli, M.: Soil moisture estimation through ASCAT and AMSR-E sensors: An intercomparison and validation study across Europe, *Remote Sensing of Environment*, 115, 3390–3408, <https://doi.org/10.1016/j.rse.2011.08.003>, 2011.
- Brocca, L., Zucco, G., Mittelbach, H., Moramarco, T., and Seneviratne, S. I.: Absolute versus temporal anomaly and percent of saturation soil moisture spatial variability for six networks worldwide, *Water Resources Research*, 50, 5560–5576, <https://doi.org/10.1002/2014WR015684>, 2014.
- Brocca, L., Massari, C., Ciabatta, L., Moramarco, T., Penna, D., Zuecco, G., Pianezzola, L., Borga, M., Matgen, P., and Martínez-Fernández, J.: Rainfall estimation from in situ soil moisture observations at several sites in Europe: an evaluation of the SM2RAIN algorithm, *Journal of Hydrology and Hydromechanics*, 63, 201–209, <https://doi.org/10.1515/johh-2015-0016>, 2015.
- Cui, C., Xu, J., Zeng, J., Chen, K.-S., Bai, X., Lu, H., Chen, Q., and Zhao, T.: Soil Moisture Mapping from Satellites: An Intercomparison of SMAP, SMOS, FY3B, AMSR2, and ESA CCI over Two Dense Network Regions at Different Spatial Scales, *Remote Sensing*, 10, 33, <https://doi.org/10.3390/rs10010033>, 2017.
- de Jeu, R. A., Holmes, T. R., Parinussa, R. M., and Owe, M.: A spatially coherent global soil moisture product with improved temporal resolution, *Journal of Hydrology*, 516, 284–296, <https://doi.org/10.1016/j.jhydrol.2014.02.015>, determination of soil moisture: Measurements and theoretical approaches, 2014.
- Dirmeyer, P. A., Wu, J., Norton, H. E., Dorigo, W. A., Quiring, S. M., Ford, T. W., Santanello, Joseph A., J., Bosilovich, M. G., Ek, M. B., Koster, R. D., Balsamo, G., and Lawrence, D. M.: Confronting Weather and Climate Models with Observational Data from Soil Moisture Networks over the United States, *Journal of Hydrometeorology*, 17, 1049–1067, <https://doi.org/10.1175/JHM-D-15-0196.1>, 2016.
- Enenkel, M., Reimer, C., Dorigo, W., Wagner, W., Pfeil, I., Parinussa, R., and De Jeu, R.: Combining satellite observations to develop a global soil moisture product for near-real-time applications, *Hydrology and Earth System Sciences*, 20, 4191–4208, <https://doi.org/10.5194/hess-20-4191-2016>, 2016.
- Eroglu, O., Kurum, M., Boyd, D., and Gurbuz, A. C.: High spatio-temporal resolution CYGNSS soil moisture estimates using artificial neural networks, *Remote Sensing*, 11, 2272, 2019.
- Gruber, A., Crow, W. T., and Dorigo, W. A.: Assimilation of Spatially Sparse In Situ Soil Moisture Networks into a Continuous Model Domain, *Water Resources Research*, 54, 1353–1367, <https://doi.org/10.1002/2017WR021277>, 2018.
- Hagan, D. F. T., Wang, G., Kim, S., Parinussa, R. M., Liu, Y., Ullah, W., Bhatti, A. S., Ma, X., Jiang, T., and Su, B.: Maximizing Temporal Correlations in Long-Term Global Satellite Soil Moisture Data-Merging, *Remote Sensing*, 12, 2164, <https://doi.org/10.3390/rs12132164>, 2020.

- Kang, C. S., Kanniah, K. D., and Kerr, Y. H.: Calibration of SMOS Soil Moisture Retrieval Algorithm: A Case of Tropical Site in Malaysia, *IEEE Transactions on Geoscience and Remote Sensing*, 57, 3827–3839, 2019.
- 320 Kerr, Y., Al-Yaari, A., Rodriguez-Fernandez, N., Parrens, M., Molero, B., Leroux, D., Bircher, S., Mahmoodi, A., Mialon, A., Richaume, P., Delwart, S., Al Bitar, A., Pellarin, T., Bindlish, R., Jackson, T., Rüdiger, C., Waldteufel, P., Mecklenburg, S., and Wigneron, J.-P.: Overview of SMOS performance in terms of global soil moisture monitoring after six years in operation, *Remote Sensing of Environment*, 180, 40–63, <https://doi.org/10.1016/j.rse.2016.02.042>, special Issue: ESA's Soil Moisture and Ocean Salinity Mission - Achievements and Applications, 2016.
- 325 Kim, S., Liu, Y., Johnson, F. M., Parinussa, R. M., and Sharma, A.: A global comparison of alternate AMSR2 soil moisture products: Why do they differ?, *Remote Sensing of Environment*, 161, 43–62, <https://doi.org/10.1016/j.rse.2015.02.002>, 2015a.
- Kim, S., Parinussa, R. M., Liu, Y. Y., Johnson, F. M., and Sharma, A.: A framework for combining multiple soil moisture retrievals based on maximizing temporal correlation, *Geophysical Research Letters*, 42, 6662–6670, <https://doi.org/10.1002/2015GL064981>, 2015b.
- Kovačević, J., Cvijetinović, Z., Stančić, N., Brodić, N., and Mihajlović, D.: New Downscaling Approach Using ESA CCI SM Products for Obtaining High Resolution Surface Soil Moisture, *Remote Sensing*, 12, 1119, <https://doi.org/10.3390/rs12071119>, 2020.
- 330 Link, M., Drusch, M., and Scipal, K.: Soil Moisture Information Content in SMOS, SMAP, AMSR2, and ASCAT Level-1 Data Over Selected In Situ Sites, *IEEE Geoscience and Remote Sensing Letters*, 17, 1213–1217, 2020.
- Liu, Y., Jing, W., Wang, Q., and Xia, X.: Generating high-resolution daily soil moisture by using spatial downscaling techniques: a comparison of six machine learning algorithms, *Advances in Water Resources*, 141, 103 601, <https://doi.org/10.1016/j.advwatres.2020.103601>, 2020.
- 335 Pan, X., Kornelsen, K. C., and Coulibaly, P.: Estimating Root Zone Soil Moisture at Continental Scale Using Neural Networks, *JAWRA Journal of the American Water Resources Association*, 53, 220–237, <https://doi.org/10.1111/1752-1688.12491>, 2017.
- Parinussa, R., Wang, G., Holmes, T., Liu, Y., Dolman, A., de Jeu, R., Jiang, T., Zhang, P., and Shi, J.: Global surface soil moisture from the Microwave Radiation Imager onboard the Fengyun-3B satellite, *International Journal of Remote Sensing*, 35, 7007–7029, <https://doi.org/10.1080/01431161.2014.960622>, 2014.
- 340 Parinussa, R., de Jeu, R., van der Schalie, R., Crow, W., Lei, F., and Holmes, T.: A Quasi-Global Approach to Improve Day-Time Satellite Surface Soil Moisture Anomalies through the Land Surface Temperature Input, *Climate*, 4, 50, <https://doi.org/10.3390/cli4040050>, 2016.
- Paulik, C., Dorigo, W., Wagner, W., and Kidd, R.: Validation of the ASCAT Soil Water Index using in situ data from the International Soil Moisture Network, *International Journal of Applied Earth Observation and Geoinformation*, 30, 1–8, <https://doi.org/10.1016/j.jag.2014.01.007>, 2014.
- 345 Pellarin, T., de Rosnay, P., Albergel, C., Abdalla, S., and al Bitar, A.: Root-zone soil moisture index complementary validation at global scale based on triple collocation method . Comparison with State-Of-The-Art global scale root-zone soil moisture products, in: H-SAF Visiting Scientist Program HSAF\_CDOP2\_VS12\_02, 2013.
- Scholze, M., Kaminski, T., Knorr, W., Blessing, S., Vossbeck, M., Grant, J., and Scipal, K.: Simultaneous assimilation of SMOS soil moisture and atmospheric CO<sub>2</sub> in-situ observations to constrain the global terrestrial carbon cycle, *Remote Sensing of Environment*, 180, 334–345, <https://doi.org/10.1016/j.rse.2016.02.058>, special Issue: ESA's Soil Moisture and Ocean Salinity Mission - Achievements and Applications, 2016.
- 350 Senyurek, V., Lei, F., Boyd, D., Kurum, M., Gurbuz, A. C., and Moorhead, R.: Machine Learning-Based CYGNSS Soil Moisture Estimates over ISMN sites in CONUS, *Remote Sensing*, 12, 1168, <https://doi.org/10.3390/rs12071168>, 2020.
- van der Schalie, R., Kerr, Y., Wigneron, J., Rodríguez-Fernández, N., Al-Yaari, A., and Jeu, R.: Global SMOS Soil Moisture Retrievals from The Land Parameter Retrieval Model, *International Journal of Applied Earth Observation and Geoinformation*, 45, 125–134, <https://doi.org/10.1016/j.jag.2015.08.005>, advances in the Validation and Application of Remotely Sensed Soil Moisture - Part 1, 2016.
- 355 Wang, L., Li, X., Chen, Y., Yang, K., Chen, D., Zhou, J., Liu, W., Qi, J., and Huang, J.: Validation of the global land data assimilation system based on measurements of soil temperature profiles, *Agricultural and Forest Meteorology*, 218–219, 288–297, <https://doi.org/10.1016/j.agrformet.2016.01.003>, 2016.
- 360 Wu, Q., Liu, H., Wang, L., and Deng, C.: Evaluation of AMSR2 soil moisture products over the contiguous United States using in situ data from the International Soil Moisture Network, *International Journal of Applied Earth Observation and Geoinformation*, 45, 187–199, <https://doi.org/10.1016/j.jag.2015.10.011>, advances in the Validation and Application of Remotely Sensed Soil Moisture - Part 1, 2016.
- Xu, H., Yuan, Q., Li, T., Shen, H., Zhang, L., and Jiang, H.: Quality Improvement of Satellite Soil Moisture Products by Fusing with In-Situ Measurements and GNSS-R Estimates in the Western Continental U.S., *Remote Sensing*, 10, 1351, <https://doi.org/10.3390/rs10091351>, 2018.
- 365 Zhao, L., Yang, Z.-L., and Hoar, T. J.: Global Soil Moisture Estimation by Assimilating AMSR-E Brightness Temperatures in a Coupled CLM4-RTM-DART System, *Journal of Hydrometeorology*, 17, 2431–2454, <https://doi.org/10.1175/JHM-D-15-0218.1>, 2016.
